# Supplementary material
Source: Springer Nature journal article supplement (https://www.springermedizin.de/resource/supplementary/12872_2013_678_MOESM5_ESM.pdf/9430640)

Number of metabolic syndrome markers

□ 0 to 1

▒ 2

▓ 3

■ 4 to 5

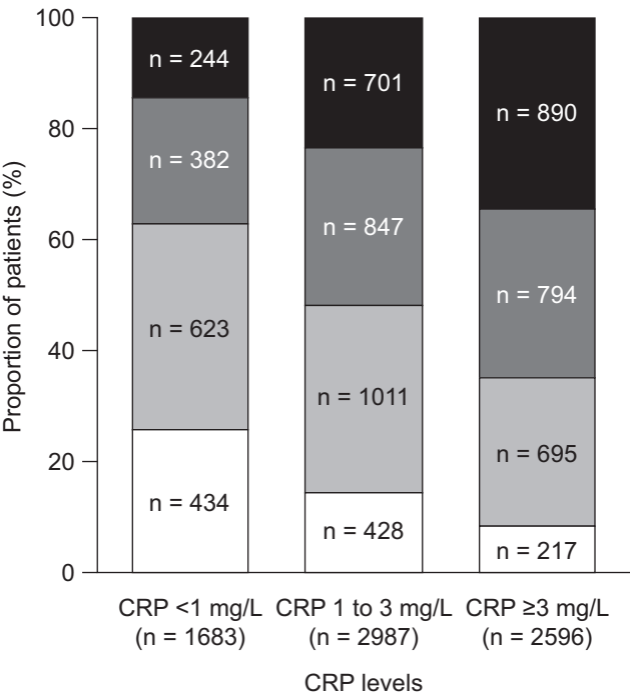

Supplement: MOESM5 [file 9430640]
